# Supplementary material for: 89Zirconium-labelled girentuximab (89Zr-TLX250) PET in Urothelial Cancer Patients (ZiPUP): protocol for a phase I trial of a novel staging modality for urothelial carcinoma
Source: PubMed Central journal article supplement — BMJ Open. 2022 Apr 15;12(4):e060478. doi: 10.1136/bmjopen-2021-060478 (PMC9014075; doi:10.1136/bmjopen-2021-060478), 2022-04-15
Supplement: bmjopen-2021-060478.draft_revisions.pdf [file bmjopen-2021-060478.draft_revisions.pdf]

# BMJ Open

BMJ Open is committed to open peer review. As part of this commitment we make the peer review history of every article we publish publicly available.

When an article is published we post the peer reviewers' comments and the authors' responses online. We also post the versions of the paper that were used during peer review. These are the versions that the peer review comments apply to.

The versions of the paper that follow are the versions that were submitted during the peer review process. They are not the versions of record or the final published versions. They should not be cited or distributed as the published version of this manuscript.

BMJ Open is an open access journal and the full, final, typeset and author-corrected version of record of the manuscript is available on our site with no access controls, subscription charges or pay-per-view fees (<http://bmjopen.bmj.com>).

If you have any questions on BMJ Open's open peer review process please email [info.bmjopen@bmj.com](mailto:info.bmjopen@bmj.com)

# BMJ Open

## 89Zirconium-labelled girentuximab (89Zr-TLX250) PET in Urothelial Cancer Patients (ZiPUP) – A phase I trial of a novel staging modality for urothelial carcinoma.

|                               |                                                                                                                                                                                                                                                                                                                                                                                                                                                                                                                                                                                                                                                                                                    |
|-------------------------------|----------------------------------------------------------------------------------------------------------------------------------------------------------------------------------------------------------------------------------------------------------------------------------------------------------------------------------------------------------------------------------------------------------------------------------------------------------------------------------------------------------------------------------------------------------------------------------------------------------------------------------------------------------------------------------------------------|
| Journal:                      | <i>BMJ Open</i>                                                                                                                                                                                                                                                                                                                                                                                                                                                                                                                                                                                                                                                                                    |
| Manuscript ID                 | bmjopen-2021-060478                                                                                                                                                                                                                                                                                                                                                                                                                                                                                                                                                                                                                                                                                |
| Article Type:                 | Protocol                                                                                                                                                                                                                                                                                                                                                                                                                                                                                                                                                                                                                                                                                           |
| Date Submitted by the Author: | 22-Dec-2021                                                                                                                                                                                                                                                                                                                                                                                                                                                                                                                                                                                                                                                                                        |
| Complete List of Authors:     | Al-Zubaidi, Mohammed; Royal Perth Hospital, Urology; Fiona Stanley Hospital, Urology<br>Viswambaram, Pravin; Fiona Stanley Hospital, Urology<br>McCombie, Steve; Fiona Stanley Hospital, Urology; UWA, Medical School<br>Liow, Elizabeth; Fiona Stanley Hospital<br>Lenzo, Nat; Fiona Stanley Hospital, Nuclear Medicine; Curtin University, Department of Medicine<br>Ferguson, Tom; Fiona Stanley Hospital, Department of Medical Oncology<br>Redfern, Andrew; Fiona Stanley Hospital, Department of Medical Oncology; UWA, School of Medicine and Pharmacology<br>Gauci, Richard; Fiona Stanley Hospital, Nuclear Medicine<br>Hayne, Dickon; University of Western Australia, School of Surgery |
| Keywords:                     | Urological tumours < ONCOLOGY, Urological tumours < UROLOGY, Nuclear radiology < RADIOLOGY & IMAGING, NUCLEAR MEDICINE                                                                                                                                                                                                                                                                                                                                                                                                                                                                                                                                                                             |
|                               |                                                                                                                                                                                                                                                                                                                                                                                                                                                                                                                                                                                                                                                                                                    |

SCHOLARONE™  
Manuscripts

# **<sup>89</sup>Zirconium-labelled girentuximab (<sup>89</sup>Zr-TLX250) PET in Urothelial Cancer Patients (ZiPUP) – A phase I trial of a novel staging modality for urothelial carcinoma.**

Mohammed Al-Zubaidi<sup>1,2</sup>, Pravin Viswambaram<sup>1,2,3</sup>, Steve P McCombie<sup>1,2,3</sup>, Elizabeth Liow<sup>2,4</sup>, Nat Lenzo<sup>1,2,5,6</sup>, Thomas Ferguson<sup>1,2</sup>, Andy Redfern<sup>1,2,3</sup>, Richard Gauci<sup>1,2</sup>, Dickon Hayne<sup>1,2,3</sup>

1. Fiona Stanley Hospital, Murdoch, Western Australia, Australia
2. Australian and New Zealand Urogenital and Prostate (ANZUP) Cancer Trial Group, Camperdown, New South Wales, Australia
3. UWA Medical School, University of Western Australia, Crawley, Western Australia, Australia
4. Peter MacCallum Cancer Centre, Melbourne, Victoria, Australia
5. GenesisCare, Perth, Western Australia, Australia
6. Department of Medicine, Curtin University, Perth, Western Australia, Australia

## **Corresponding author details:**

Mohammed Al-Zubaidi  
Urology Department  
Fiona Stanley Hospital, Murdoch, WA 6150, Australia.  
E: [mohammed\\_az1985@yahoo.com](mailto:mohammed_az1985@yahoo.com)  
M: +61 478 416 576

## **ABSTRACT**

### **Introduction**

Bladder cancer is a lethal disease with a rising incidence. The current standard imaging modalities for staging are either CT of the chest-abdomen-pelvis or FDG-PET/CT. However, there are issues with using these modalities. CT is known to have relatively low sensitivity for detecting low volume metastatic disease, while FDG is predominantly renally excreted and therefore has intense activity in the urinary tract, which limits its utility to detect bladder and upper tract lesions, or nodal metastases in close proximity to the urinary tract. <sup>89</sup>Zr-TLX250 may have utility in the accurate staging of bladder and urothelial cancer, with less renal excretion as compared to FDG, however this has not previously been investigated.

### **Methods and analysis:**

A single-arm phase I trial examining the feasibility, safety, and utility of <sup>89</sup>Zr-TLX250-PET/CT in patients either undergoing pre-operative staging of bladder or other urothelial carcinoma for curative intent, or with known metastatic urothelial carcinoma. All participants will undergo <sup>89</sup>Zr-TLX250-PET/CT and will need to have undergone recent FDG-PET/CT for means of comparison. This trial aims to recruit 10 participants undergoing pre-operative staging and 10 participants with known metastatic disease. The primary endpoint is feasibility; secondary endpoints are safety, tolerability, and sensitivity and specificity in detecting lymph node metastases compared to FDG-PET/CT.

### **Ethics and dissemination:**

Ethics approval has been obtained from the South Metropolitan Health Service Human Research Ethics Committee (RGS0000003940). ZiPUP study has been registered with the Australian and New Zealand

Clinical Trials Registry (Trial ID *NCT05046665*, registration number is *ACTRN12621000411842*). Also, it has been registered with the ClinicalTrials.gov (ClinicalTrials.gov identifier is *NCT05046665*, obsolete identifier *NCT05018442*). Eligible patients will only be enrolled after providing written informed consent. Patients will be given a full explanation, in lay terms, of the aims of the study and potential risks including as a written patient information sheet.

### Strength and limitation of the study:

- <sup>89</sup>Zr-TLX250 is metabolised in the liver with less renal excretion as compared to FDG.
- If proven effective this may present a useful staging modality for urothelial cancer and bladder cancer detecting small tumours.
- If proven effective, then it has the potentiality to therapeutic or ‘theranostic’.
- The aimed recruited patients’ number is small.
- Unknown quality of images will be obtained.

### Keywords:

Zirconium, Girentuximab, bladder cancer, urinary tract cancer, urothelial cancer, Positron Emission Tomography/Computed Tomography (PET/CT), Carbonic anhydrase IX, theranostic

## ABBREVIATIONS

<sup>89</sup>Zr-TLX250: <sup>89</sup>Zirconium-labelled girentuximab

CAIX: Carbonic anhydrase IX

FDG PET: Fluorodeoxyglucose positron emitting tomography

CT: Computed tomography

<sup>177</sup>Lu-PSMA-617: Lutetium-177 prostate-specific membrane antigen

ccRCC: Clear Cell Renal Cell Carcinoma

T-DM1: Ado-trastuzumab emtansine

HER2: human epidermal growth factor receptor 2

HSP90: Heat Shock Protein 90

NVP-AUY922: Luminespib

mBq: Megabecquerels

ECOG: Eastern Cooperative Oncology Group

ECG: Electrocardiogram

β-HCG: Beta-human chorionic gonadotropin

## INTRODUCTION

### Urothelial cancer:

1  
2  
3 Bladder cancer is a lethal disease with a rising incidence worldwide [1]. It is the most common  
4 malignancy involving the urinary system, and the tenth most common malignancy overall [2].  
5 Transitional cell carcinoma is the predominant histologic type, accounting for approximately 90  
6 percent of all bladder cancers. Urothelial cancers can also arise in the renal pelvis, ureter, or urethra.  
7 The diagnosis is usually confirmed histologically based on a transurethral resection or biopsy  
8 specimen, percutaneous biopsy, or urine cytology. The spectrum of urothelial cancer at presentation  
9 includes non-muscle-invasive, muscle-invasive, and metastatic disease, as determined by  
10 histopathology and staging investigations.  
11  
12

### 13 **Current staging modalities:**

14  
15  
16 The following modalities are currently utilised to detect the location and extent of urothelial tumours:

17  
18 **Computed Tomography (CT)** of the chest, abdomen and pelvis along with delayed-phase images are  
19 used to identify urothelial tumours, which may appear as filling defects on delayed-phase imaging  
20 with enhancing soft tissue on the nephrographic phase. CT may demonstrate extravescical extension,  
21 nodal involvement in the pelvis or retroperitoneum, visceral or osseous metastasis, and tumour  
22 involvement or obstruction of the upper urinary tract. CT may miss tumours <1 cm in size,  
23 particularly those in the bladder trigone or dome, and it cannot accurately categorize depth of  
24 bladder wall invasion. The sensitivity of CT for identification of nodal involvement is relatively low  
25 (false-negative rate 68%, false-positive rate 16%) and may require a needle or excisional biopsy for  
26 confirmation [3]. Approximately 50% of patients with a filling defect in the renal pelvis or ureter will  
27 have associated hydronephrosis, hydroureter, or a delayed nephrogram secondary to obstruction  
28 [4].  
29  
30

31  
32 **<sup>18</sup>F-fluorodeoxyglucose (FDG) positron emitting tomography (PET)/CT** has limited value in the local  
33 staging of bladder cancer, largely due to urinary excretion of FDG affecting image interpretation of  
34 the bladder and any nodal disease in close proximity to the ureters [5]. However, FDG PET/CT is  
35 often useful in the distant staging of urothelial cancer, especially in high-risk disease with sensitivity  
36 of 78% in detecting locoregional lymph node metastasis as compared to 44% with CT only [6].  
37  
38  
39

### 40 **Carbonic anhydrase (CAIX)**

41  
42 CAIX is an enzyme that functions as a regulator of intracellular pH, cell proliferation, and cell adhesion  
43 in response to hypoxia [7]. CAIX is expressed abundantly in response to hypoxia in a wide range of  
44 cancer cell lines including bladder, renal, head and neck, lung, and colon cancer [7].  
45  
46

47  
48 Previous data has demonstrated sensitivity and specificity of urinary CAIX of 86.2% and 95.1%  
49 respectively, for detection of urothelial bladder cancer (area under the curve 90.5%) [8]. A significant  
50 association between CAIX expression in paired urine and tumour specimens has also been established  
51 [7]. Notably, CAIX was shown to have significantly higher predictive accuracy compared to urinary  
52 cytology (90.5% vs 71.7%), especially in low-grade tumours (90% vs 61.8%).  
53

54  
55 CAIX appears to be expressed differently in non-muscle-invasive versus muscle-invasive bladder  
56 tumours, and in low-grade versus high-grade bladder cancers [9]. Importantly, in one study CAIX was  
57 distinctly expressed in >70% of urothelial carcinomas but was not expressed in normal urothelial tissue  
58 [10]. CAIX was also found to perform well as a prognostic marker, expression predicting for invasive  
59 recurrence of superficial disease and being the strongest independent predictor of worse recurrence-  
60 free and overall survival in invasive disease [10]. These findings provide strong rationale for

investigating the potential use of CAIX as a targeted imaging agent for the identification and diagnosis of bladder cancer. By the same token, the utility of CAIX as a therapeutic target also merits future investigation.

## Positron Emission Tomography / Computed Tomography (PET/CT) and Zirconium-89-girentuximab ( $^{89}\text{Zr}$ -TLX250)

Theranostic PET is a novel modality for both imaging and treatment as it enables the tracking of targeted vehicles and carriers using isotope-labelled monoclonal antibodies. Many ligand-target combinations have been studied for both diagnostic and therapeutic use. A notable example in the field of theranostics with an established therapeutic role is  $^{177}\text{Lu}$ -PSMA-617, a radionuclide agent that has garnered success in the treatment of castrate-resistant prostate cancer [11].

Due to its intrinsic chemical properties,  $^{89}\text{Zr}$  has been identified as a suitable ligand candidate for this approach [9]. Girentuximab (initially designated as TLX-250) is an antibody directed against CAIX that has been widely studied in the setting of renal cell carcinoma. For example,  $^{89}\text{Zr}$ -TLX250 PET/CT has been shown to have a significant impact on clinical decision making in patients with an indeterminate renal mass [12]. Studies have also explored the use of  $^{89}\text{Zr}$ -immuno-PET with other conjugated antibodies as a potential tool in staging breast cancer, and it has also shown utility for monitoring treatment in animal models [13].

Since its introduction in the 1980s, over 2000 girentuximab injections have been administered worldwide across multiple clinical trials. To date, there have been no reports of serious side effects or allergic reactions to girentuximab. There are a wide range of potential clinical applications for  $^{89}\text{Zr}$ -TLX250 PET/CT including diagnosis and staging, patient stratification, monitoring of treatment response, and planning of radio-immunotherapy [14].

Urinary excretion of FDG PET/CT is intrinsically problematic when imaging urinary tract malignancies. Hepatic clearance of  $^{89}\text{Zr}$ -TLX250 with low urinary excretion is therefore expected to be advantageous for the local and regional staging of bladder and urothelial carcinomas.

Collectively these studies highlight the potential diagnostic and therapeutic applications of  $^{89}\text{Zr}$ -TLX250. This Phase I study aims to investigate the extension of its application into the staging of urothelial carcinoma or bladder cancer.

## METHODS AND ANALYSIS

### Protocol overview

This is a non-randomised, non-blinded, single centre, phase I trial comparing  $^{89}\text{Zr}$ -TLX250 PET/CT with FDG PET/CT in patients with urothelial carcinoma or bladder cancer. The phase I study duration will be 18 months (Started May 2021 with anticipated date of last data collection will be December 31<sup>st</sup>, 2022). It is being conducted at a single tertiary centre in Western Australia. It will include two cohorts of adult patients: ten patients undergoing preoperative primary staging for recently diagnosed bladder cancer or urothelial carcinoma for curative intent, and ten patients with known metastatic urothelial carcinoma or bladder cancer.

The primary objective of this study is to evaluate the feasibility of using  $^{89}\text{Zr}$ -TLX250 PET/CT as a staging modality for urothelial carcinoma or bladder cancer. The secondary objectives are to evaluate the safety and tolerability of  $^{89}\text{Zr}$ -TLX250 PET/CT, as well as its effectiveness as compared to FDG PET/CT. The eligibility criteria are listed in Table 1 and the trial schema is outlined in Figure 1. Eligible patients are also required to have had an FDG PET/CT (as part of standard of care) within the last 28 days to allow accurate comparison between the two modalities. All participants will provide written informed consent.

**TABLE 1:** Key inclusion and exclusion criteria

| <b><i>Inclusion criteria</i></b> |                                                                                                                                                                                                                                                                                                                                  |
|----------------------------------|----------------------------------------------------------------------------------------------------------------------------------------------------------------------------------------------------------------------------------------------------------------------------------------------------------------------------------|
| 1.                               | Aged $\geq 18$                                                                                                                                                                                                                                                                                                                   |
| 2.                               | Able to provide informed consent                                                                                                                                                                                                                                                                                                 |
| 3.                               | Histologically diagnosed with urothelial carcinoma or bladder cancer (or upper tract urothelial carcinoma diagnosed based on standard imaging and malignant urine cytology or direct visualisation on ureteroscopy) or known metastatic bladder or other urothelial carcinoma (based on previous imaging and /or histopathology) |
| 4.                               | Negative serum pregnancy test in female patients of childbearing potential at screening. Confirmation of negative pregnancy test result from urine within 24 hours prior to receiving investigational product.                                                                                                                   |
| 5.                               | Consent to practise double-barrier contraception until a minimum of 42 days after $^{89}\text{Zr}$ -TLX250 administration.                                                                                                                                                                                                       |
| <b><i>Exclusion criteria</i></b> |                                                                                                                                                                                                                                                                                                                                  |
| 1.                               | Active malignancy other than urothelial carcinoma or bladder cancer                                                                                                                                                                                                                                                              |
| 2.                               | Administration of a radioisotope within 10 physical half-lives of $^{89}\text{Zr}$ prior to study enrolment.                                                                                                                                                                                                                     |
| 3.                               | Administration of chemotherapy, radiotherapy, or immunotherapy within 4 weeks prior to planned administration of $^{89}\text{Zr}$ -TLX250 or continuing adverse effects from such therapy                                                                                                                                        |
| 4.                               | Planned antineoplastic therapies for the period between administration of $^{89}\text{Zr}$ -TLX250 and imaging                                                                                                                                                                                                                   |
| 5.                               | Serious non-malignant disease that may interfere with the objectives of the study                                                                                                                                                                                                                                                |
| 6.                               | Renal insufficiency with glomerular filtration rate $\leq 45$ mL/min/1.73m <sup>2</sup>                                                                                                                                                                                                                                          |
| 7.                               | Pregnancy or lactation                                                                                                                                                                                                                                                                                                           |
| 8.                               | Exposure to murine or chimeric antibodies within the last 5 years                                                                                                                                                                                                                                                                |
| 9.                               | Known hypersensitivity or human anti-chimeric antibodies against girentuximab.                                                                                                                                                                                                                                                   |
| 10.                              | Exposure to any experimental diagnostic or therapeutic drug 30 days prior to the date of planned administration of $^{89}\text{Zr}$ -TLX250                                                                                                                                                                                      |
| 11.                              | Contraindications to FDG PET/CT                                                                                                                                                                                                                                                                                                  |

## Screening:

Procedures performed during the screening visit include a review of patient eligibility (Table 1) and the obtaining of informed consent for trial enrolment. Participants will then undergo screening assessments including physical examination, recording of Eastern Cooperative Oncology Group (ECOG) Performance Status, vital signs, 12-lead electrocardiogram (ECG), review of prior/concomitant medications, and clinical laboratory tests (full blood count, urea and electrolytes, liver function test,

serum  $\beta$ -HCG if applicable and urine analysis) as summarized in the schedule of study assessments (Table 2).

**Table 2: The schedule of study assessments is set out as follows:**

| Visit Name                  | Screening     | IMP Administration          | Imaging       | Follow Up                                                         |
|-----------------------------|---------------|-----------------------------|---------------|-------------------------------------------------------------------|
| Time point                  | Day -28 to -1 | Day 0                       | Day 5 $\pm$ 2 | Day 14<br>(or before starting chemotherapy or undergoing surgery) |
| Informed consent            | X             |                             |               |                                                                   |
| Eligibility criteria        | X             |                             |               |                                                                   |
| $^{18}\text{F}$ -FDG-PET/CT | X             |                             |               |                                                                   |
| Physical exam               | X             |                             |               |                                                                   |
| ECOG status                 | X             |                             |               |                                                                   |
| Vital signs                 | X             | X<br>Pre and post injection | X             |                                                                   |
| 12 lead ECG                 | X             | X<br>Post injection         |               |                                                                   |
| Haematology                 |               |                             |               |                                                                   |
| Biochemistry                | X             |                             |               |                                                                   |
| Liver function tests        | X             |                             |               |                                                                   |
| Serum $\beta$ -HCG          | X             |                             |               |                                                                   |
| Urine analysis              | X             |                             |               |                                                                   |
| Urine pregnancy test        |               | X                           |               |                                                                   |
| PET/CT                      |               |                             | X             |                                                                   |
| Adverse events              |               | X                           | X             | X                                                                 |
| Concomitant Medications     | X             | X                           | X             | X                                                                 |

### **$^{89}\text{Zr}$ Zirconium labelled girentuximab administration (Day 0)**

On the day of injection, a urine pregnancy test will be performed to confirm ongoing non-pregnant status in all pre-menopausal women. A slow intravenous administration of 37 mBq (+/- 10%)  $^{89}\text{Zr}$ -TLX250, containing a mass dose of 10mg of girentuximab, will be delivered over 3 minutes. Vital signs and a 12 lead ECG will be performed before and after the intravenous injection. Adverse event recording according to the NCI-CTCAE v 5.0 will be performed following administration of the agent.

### **Imaging (Day 5 +/- 2)**

As part of PET/CT hybrid acquisition, whole body PET static and low-dose CT including brain to mid-thigh will be performed. Vital signs will be recorded. Those who have potentially significant lesions with increased uptake on  $^{89}\text{Zr}$ -TLX250 PET/CT but not on FDG PET/CT will have their imaging discussed at the next available Uro-Oncology Multi-disciplinary Team (MDT) meeting to determine if further investigation or a deviation in management plan is required. Adverse event recording will be performed as previously discussed.



## Follow up (Day 14)

Participants will receive a phone consultation two weeks following the administration of the  $^{89}\text{Zr}$ -TLX250 (or before commencement of treatment) that will include a symptom enquiry, recording of medications, and adverse event recording (NCI-CTC v 5.0).

## Endpoints:

The primary endpoint is the feasibility of using  $^{89}\text{Zr}$ -TLX250 PET/CT as a staging modality for urothelial carcinoma or bladder cancer. The feasibility will be ascertained by the ability to recruit to the target sample size and deliver the  $^{89}\text{Zr}$ -TLX250 PET/CT.

Secondary endpoints are the safety, tolerability, effectiveness, sensitivity, and specificity of  $^{89}\text{Zr}$ -TLX250 PET/CT as compared to FDG PET/CT. Safety and tolerability will be assessed according to vital signs, 12-lead ECGs, adverse event records, and the requirement for new medications. As part of the effectiveness analysis, tumour versus mediastinal uptake ratios will be calculated and compared for both the primary tumour and any other lesions identified for both modalities. The sensitivity and specificity of  $^{89}\text{Zr}$ -TLX250 PET/CT for detecting lymph node metastases will be calculated as compared to both FDG PET/CT and pathological lymph node status, where the patient proceeds to radical cystectomy and pelvic lymph node dissection.

A pragmatic target sample size of 20 patients has been chosen for this phase I feasibility study, based on clinical context and logistical factors. Descriptive statistics will be used in the reporting of the primary and secondary endpoints for this pilot study using appropriate parametric and non-parametric tests.

## Patient and Public Involvement:

Patients or the public are not involved in the design, or conduct, or reporting, or dissemination plans of our research.

## ETHICS AND DISSEMINATION

Ethics approval has been obtained from the South Metropolitan Health Service Human Research Ethics Committee (*RGS0000003940*). ZiPUP study has been registered with the Australian and New Zealand Clinical Trials Registry (Trial ID *NCT05046665*, registration number is *ACTRN12621000411842*). Also, it has been registered with the ClinicalTrials.gov (ClinicalTrials.gov identifier is *NCT05046665*, obsolete identifier *NCT05018442*).

Eligible patients will only be enrolled, and study-related procedures carried out after providing written informed consent. Patients will be given a full explanation, in lay terms, of the aims of the study and potential risks including as a written patient information sheet. It will be explained that they may refuse to take part in or withdraw from the study without prejudice to their future care and treatment at any time. In any case where the patient is not fluent in English an interpreter will be present during the consenting process. Participants will be issued with a copy of the information provided and their signed consent to participate in the study

## DISCUSSION

<sup>89</sup>Zr-immuno-PET/CT has proven utility as a diagnostic modality in both renal cell cancer and breast cancer. In this trial, we are evaluating the utility of <sup>89</sup>Zr-TLX250 PET/CT in staging urothelial cancer and bladder cancer, as compared with FDG PET/CT. Of note, <sup>89</sup>Zr-TLX250 is metabolised in the liver with minimal renal excretion, which may be advantageous when staging tumours of the urinary tract. If proven effective this may present a useful staging modality for urothelial cancer and bladder cancer, with the potential to be extended as a therapeutic or 'theranostic' in patients with these cancers.

## CONTRIBUTIONSHIP STATEMENT

Al-Zubaidi M: Write and reviewing the protocol as per BMJ Open requirement.

Viswambaram P: Write the initial protocol draft and review the final draft.

McCombie Steve: Review and edit the final draft.

Elizabeth Liow: Participated in protocol draft writing.

Nat Lenzo: Review and edit the final draft.

Thomas Ferguson: Participated in protocol draft writing.

Andy Redfern: Review and edit the final draft

Richard Gauci: Write the protocol draft.

Dickon Hayne: Review the protocol draft, main supervisor of the study.

## COMPETING INTERESTS

There is no competing interests

## FUNDING

The study is sponsored by the South Metropolitan Health Service, Western Australia and is funded by Telix pharmaceuticals®, who will also supply the <sup>89</sup>Zr-TLX250 at no cost.

## DATA SHARING STATEMENT

Data collected from participants during the trial will be available by the end of it after deidentification. Study protocol, statistical analysis plan, informed consent form and clinical study report will be available after publication indefinitely, and available to be accesses by any individual.

## REFERENCES

1. S Harsanyi, S Ziaran, K Bevizova, Z Varchulova Novakova, B Trebaticky, P Bujdak, S Galbavy, L Danisovic. The prognostic value of E-cadherin and Ki-67 compared to standard histopathologic examination in non-muscle invasive bladder cancer. Bratisl Lek Listy, 2020;121(6):444-449.
2. IARC, Cancer Today. Estimated number of new cases in 2020, worldwide, both sexes, all ages. 2021 [access date March 2021].
3. Herr HW. Routine CT scan in cystectomy patients: does it change management? Urology 1996; 47:324.
4. Donat MD, Herr HW. Transitional cell carcinoma of the renal pelvis and ureter: diagnosis, staging, management, and prognosis. In: Urologic Oncology, Osterling JE, Richie JP (Eds), WB Saunders Harcourt Brace & Co, Philadelphia 1997. p.215

- 1
  - 2
  - 3
  - 4
  - 5
  - 6
  - 7
  - 8
  - 9
  - 10
  - 11
  - 12
  - 13
  - 14
  - 15
  - 16
  - 17
  - 18
  - 19
  - 20
  - 21
  - 22
  - 23
  - 24
  - 25
  - 26
  - 27
  - 28
  - 29
  - 30
  - 31
  - 32
  - 33
  - 34
  - 35
  - 36
  - 37
  - 38
  - 39
  - 40
  - 41
  - 42
  - 43
  - 44
  - 45
  - 46
  - 47
  - 48
  - 49
  - 50
  - 51
  - 52
  - 53
  - 54
  - 55
  - 56
  - 57
  - 58
  - 59
  - 60
5. Jana S, Blaurox MD. Nuclear medicine studies of the prostate, testes, and bladder. *Semin Nucl Med* 2006; 36:51.
  6. Nayak B, Dogra PN, Naswa N, Kumar R. Diuretic 18F-FDG PET/CT imaging for detection and locoregional staging of urinary bladder cancer: prospective evaluation of a novel technique. *Eur J Nucl Med Mol Imaging* 2013; 40:386–393.
  7. Ivanov S, Liao SY, Ivanova A, Danilkovitch-Miagkova A, Tarasova N, Weirich G, Merrill MJ, Proescholdt MA, Oldfield EH, Lee J, et al: Expression of hypoxia-inducible cell-surface transmembrane carbonic anhydrases in human cancer. *Am J Pathol.* 2001, 158 (3): 905-919.
  8. Steffens, M.G., et al., Targeting of renal cell carcinoma with iodine-131-labeled chimeric monoclonal antibody G250. *J Clin Oncol*, 1997. 15(4): p. 1529-37
  9. de Martino, Michela, et al. "Carbonic anhydrase IX as a diagnostic urinary marker for urothelial bladder cancer." *European urology* 68.4 (2015): 552-554.
  10. Klatter, Tobias, et al. "Carbonic anhydrase IX in bladder cancer: a diagnostic, prognostic, and therapeutic molecular marker." *Cancer: Interdisciplinary International Journal of the American Cancer Society* 115.7 (2009): 1448-1458.
  11. Hofman, Michael S., et al. "[177Lu]-PSMA-617 radionuclide treatment in patients with metastatic castration-resistant prostate cancer (LuPSMA trial): a single-centre, single-arm, phase 2 study." *The Lancet Oncology* 19.6 (2018): 825-833.
  12. Hekman, Marlène CH, et al. "Positron emission tomography/computed tomography with 89Zr-girentuximab can aid in diagnostic dilemmas of clear cell renal cell carcinoma suspicion." *European urology* 74.3 (2018): 257-260.
  13. Gaykema, Sietske BM, et al. "89Zr-bevacizumab PET imaging in primary breast cancer." *Journal of nuclear medicine* 54.7 (2013): 1014-1018.
  14. Holland, J.P., et al. "Measuring the pharmacodynamic effects of a novel Hsp90 inhibitor on HER2/neu expression in mice using Zr-89-DFO-trastuzumab. *PLoS ONE* 5.1 (2010): e8859

## FIGURES

Figure 1: Trial Schema

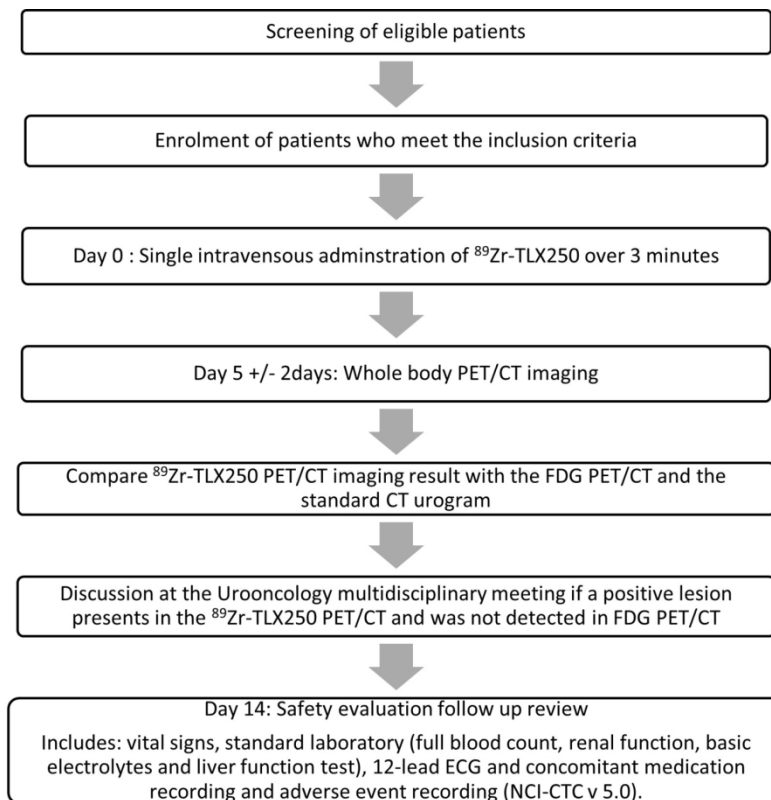

Trial schema

159x128mm (300 x 300 DPI)

# BMJ Open

## 89Zirconium-labelled girentuximab (89Zr-TLX250) PET in Urothelial Cancer Patients (ZiPUP) – Protocol for a phase I trial of a novel staging modality for urothelial carcinoma.

|                                 |                                                                                                                                                                                                                                                                                                                                                                                                                                                                                                                                                                                                                                                                                                    |
|---------------------------------|----------------------------------------------------------------------------------------------------------------------------------------------------------------------------------------------------------------------------------------------------------------------------------------------------------------------------------------------------------------------------------------------------------------------------------------------------------------------------------------------------------------------------------------------------------------------------------------------------------------------------------------------------------------------------------------------------|
| Journal:                        | <i>BMJ Open</i>                                                                                                                                                                                                                                                                                                                                                                                                                                                                                                                                                                                                                                                                                    |
| Manuscript ID                   | bmjopen-2021-060478.R1                                                                                                                                                                                                                                                                                                                                                                                                                                                                                                                                                                                                                                                                             |
| Article Type:                   | Protocol                                                                                                                                                                                                                                                                                                                                                                                                                                                                                                                                                                                                                                                                                           |
| Date Submitted by the Author:   | 02-Mar-2022                                                                                                                                                                                                                                                                                                                                                                                                                                                                                                                                                                                                                                                                                        |
| Complete List of Authors:       | Al-Zubaidi, Mohammed; Royal Perth Hospital, Urology; Fiona Stanley Hospital, Urology<br>Viswambaram, Pravin; Fiona Stanley Hospital, Urology<br>McCombie, Steve; Fiona Stanley Hospital, Urology; UWA, Medical School<br>Liow, Elizabeth; Fiona Stanley Hospital<br>Lenzo, Nat; Fiona Stanley Hospital, Nuclear Medicine; Curtin University, Department of Medicine<br>Ferguson, Tom; Fiona Stanley Hospital, Department of Medical Oncology<br>Redfern, Andrew; Fiona Stanley Hospital, Department of Medical Oncology; UWA, School of Medicine and Pharmacology<br>Gauci, Richard; Fiona Stanley Hospital, Nuclear Medicine<br>Hayne, Dickon; University of Western Australia, School of Surgery |
| <b>Primary Subject Heading</b>: | Urology                                                                                                                                                                                                                                                                                                                                                                                                                                                                                                                                                                                                                                                                                            |
| Secondary Subject Heading:      | Radiology and imaging, Oncology                                                                                                                                                                                                                                                                                                                                                                                                                                                                                                                                                                                                                                                                    |
| Keywords:                       | Urological tumours < ONCOLOGY, Urological tumours < UROLOGY, Nuclear radiology < RADIOLOGY & IMAGING, NUCLEAR MEDICINE                                                                                                                                                                                                                                                                                                                                                                                                                                                                                                                                                                             |
|                                 |                                                                                                                                                                                                                                                                                                                                                                                                                                                                                                                                                                                                                                                                                                    |

SCHOLARONE™  
Manuscripts

# **<sup>89</sup>Zirconium-labelled girentuximab (<sup>89</sup>Zr-TLX250) PET in Urothelial Cancer Patients (ZiPUP) – Protocol for a phase I trial of a novel staging modality for urothelial carcinoma.**

Mohammed Al-Zubaidi<sup>1,2</sup>, Pravin Viswambaram<sup>1,2,3</sup>, Steve P McCombie<sup>1,2,3</sup>, Elizabeth Liow<sup>2,4</sup>, Nat Lenzo<sup>1,2,5,6</sup>, Thomas Ferguson<sup>1,2</sup>, Andy Redfern<sup>1,2,3</sup>, Richard Gauci<sup>1,2</sup>, Dickon Hayne<sup>1,2,3</sup>

1. Fiona Stanley Hospital, Murdoch, Western Australia, Australia
2. Australian and New Zealand Urogenital and Prostate (ANZUP) Cancer Trial Group, Camperdown, New South Wales, Australia
3. UWA Medical School, University of Western Australia, Crawley, Western Australia, Australia
4. Peter MacCallum Cancer Centre, Melbourne, Victoria, Australia
5. GenesisCare, Perth, Western Australia, Australia
6. Department of Medicine, Curtin University, Perth, Western Australia, Australia

## **Corresponding author details:**

Mohammed Al-Zubaidi  
Urology Department  
Fiona Stanley Hospital, Murdoch, WA 6150, Australia.  
E: [mohammed\\_az1985@yahoo.com](mailto:mohammed_az1985@yahoo.com)  
M: +61 478 416 576

## **ABSTRACT**

### **Introduction**

Bladder cancer is a lethal disease with a rising incidence on a background of limited conventional imaging modalities for staging (either CT of the chest-abdomen-pelvis or FDG-PET/CT). CT is known to have relatively low sensitivity for detecting low volume metastatic disease, an important goal when considering surgical interventions entailing significant potential morbidity. FDG is also limited, being predominantly renally excreted and therefore producing intense non-specific activity in the urinary tract, which limits its utility to detect bladder and upper tract lesions, or nodal metastases in close proximity to the urinary tract. <sup>89</sup>Zr-TLX250 may have utility in the accurate staging of bladder and urothelial carcinomas, with less renal excretion as compared to FDG, however this has not previously been investigated.

### **Methods and analysis:**

ZiPUP is a single-arm phase I trial examining the feasibility of using <sup>89</sup>Zr-TLX250-PET/CT as a staging modality for urothelial carcinomas or bladder cancer by examining isotope uptake by the cancer. This trial will also examine the safety and utility of <sup>89</sup>Zr-TLX250-PET/CT in patients either undergoing pre-operative staging of bladder or other urothelial carcinomas for curative intent, or with known metastatic urothelial carcinomas. All participants will undergo <sup>89</sup>Zr-TLX250-PET/CT and will need to have undergone recent FDG-PET/CT for comparison. This trial aims to recruit 10 participants undergoing pre-operative staging and 10 participants with known metastatic disease. The primary endpoint is feasibility; secondary endpoints are safety, tolerability, sensitivity and specificity in detecting lymph node metastases compared to FDG-PET/CT.

### Ethics and dissemination:

Ethics approval has been obtained from the South Metropolitan Health Service Human Research Ethics Committee (RGS000003940). ZiPUP study has been registered with the Australian and New Zealand Clinical Trials Registry (registration number ACTRN12621000411842) and with the ClinicalTrials.gov (ClinicalTrials.gov identifier NCT05046665). Eligible patients will only be enrolled after providing written informed consent. Patients will be given a full explanation, in lay terms, of the aims of the study and potential risks including as a written patient information sheet.

### Strengths and limitations of the study:

- $^{89}\text{Zr}$ -TLX250 is metabolised in the liver with less renal excretion as compared to FDG.
- The targeted recruitment is small and so power to detect modest differences limited.
- The resolution quality of images that will be obtained and the optimum imaging timing have yet to be determined.

### Keywords:

Zirconium, Girentuximab, bladder cancer, urinary tract cancer, urothelial carcinoma,  $^{18}\text{F}$ -fluorodeoxyglucose (FDG), Positron Emission Tomography/Computed Tomography (PET/CT), Carbonic anhydrase IX.

## ABBREVIATIONS

$^{89}\text{Zr}$ -TLX250:  $^{89}\text{Zr}$ zirconium-labelled girentuximab

CAIX: Carbonic anhydrase IX

FDG PET: Fluorodeoxyglucose positron emitting tomography

CT: Computed tomography

$^{177}\text{Lu}$ -PSMA-617: Lutetium-177 prostate-specific membrane antigen

ccRCC: Clear Cell Renal Cell Carcinoma

T-DM1: Ado-trastuzumab emtansine

HER2: human epidermal growth factor receptor 2

HSP90: Heat Shock Protein 90

NVP-AUY922: Luminespib

MBq: Mega-Becquerel

ECOG: Eastern Cooperative Oncology Group

ECG: Electrocardiogram

$\beta$ -HCG: Beta-human chorionic gonadotropin

NCI-CTCAE v 5.0: National Cancer Institute – Common Terminology Criteria for Adverse Effects version 5.0

## INTRODUCTION

## Urothelial cancer:

Bladder cancer is the most common malignancy involving the urinary system, and the tenth most common malignancy overall [1] with a rising incidence worldwide [2]. Transitional cell carcinoma is the predominant histologic type, accounting for approximately 90% of all bladder cancers. Transitional cell carcinoma also affects the renal pelvis, ureter or urethra as all are lined with transitional cell urothelium. Histology is the usual confirmatory diagnostic test, tissue can be obtained as a transurethral resection, biopsy, or urine cytology. As with all malignancies, the prognosis and treatment of the disease is determined by the histopathology and staging investigations.

### Current staging modalities:

The following modalities are currently utilised to detect the distribution and extent of urothelial tumours:

**Computed Tomography (CT)** of the chest, abdomen and pelvis including delayed-phase images are used to identify urothelial tumours, which may appear as filling defects on delayed-phase imaging or as enhancing soft tissue on the nephrographic phase. CT may demonstrate extravesical extension, tumour involvement or obstruction of the upper urinary tract nodal, involvement in the pelvis or retroperitoneum, and visceral or osseous metastasis. CT may miss tumours <1 cm in size, particularly those in the bladder trigone or dome, and it cannot accurately categorize depth of bladder wall invasion. The sensitivity of CT for identification of nodal involvement is relatively low (false-negative rate 68%, false-positive rate 16%) and may require a needle or excisional biopsy for confirmation [3]. Approximately 50% of patients with a filling defect in the renal pelvis or ureter will have associated hydronephrosis, hydroureter, or a delayed nephrogram secondary to obstruction [4].

**<sup>18</sup>F-fluorodeoxyglucose (FDG) positron emitting tomography (PET)/CT** has limited value in the local staging of bladder cancer, largely due to urinary excretion of FDG affecting image interpretation of the bladder and any nodal disease in close proximity to the ureters [5]. However, FDG PET/CT is often useful in the distant staging of urothelial cancer, especially in high-risk disease with sensitivity of 78% in detecting locoregional lymph node metastasis as compared to 44% with CT alone [6].

### Carbonic anhydrase IX (CAIX)

CAIX is an enzyme that functions as a regulator of intracellular pH, cell proliferation, and cell adhesion in response to hypoxia [7]. CAIX is expressed abundantly in response to hypoxia in a wide range of cancer cell lines including bladder, renal, head and neck, lung, and colon cancers [7].

CAIX was distinctly expressed in >70% of urothelial carcinomas but was not expressed in normal urothelial tissue [8]. Previous data has demonstrated sensitivity and specificity of urinary CAIX of 86.2% and 95.1% respectively, for detection of urothelial bladder cancer (area under the curve 90.5%) [9]. A significant association between CAIX expression in paired urine and tumour specimens has been established. Notably, CAIX was shown to have significantly higher predictive accuracy for urothelial cancer compared to urinary cytology (90.5% vs 71.7%), especially in low-grade tumours (90% vs 61.8%) [9].



1  
2  
3 These findings provide strong rationale for investigating the potential use of CAIX as a targeted  
4 imaging agent for the identification and diagnosis of bladder cancer. By the same token, the utility of  
5 CAIX as a therapeutic target also merits future investigation.  
6  
7  
8

## 9 **Positron Emission Tomography / Computed Tomography (PET/CT)** 10 **and <sup>89</sup>Zirconium-girentuximab (<sup>89</sup>Zr-TLX250)**

11  
12 Theranostic PET is a novel modality, combining the potential for both imaging and treatment as it  
13 enables the tracking of targeted vehicles and carriers using, for instance, isotope-labelled monoclonal  
14 antibodies. A notable example in the field of theranostics with an established therapeutic role is <sup>177</sup>Lu-  
15 PSMA-617, a radionuclide agent that has garnered success in the treatment of castrate-resistant  
16 prostate cancer [10].  
17

18  
19 Due to the intrinsic chemical properties of the relatively low energy positrons which provide high  
20 resolution PET images [11], <sup>89</sup>Zr has been identified as a suitable ligand candidate for this approach  
21 [12]. Girentuximab (TLX-250) is an antibody directed against CAIX that has been widely studied in the  
22 setting of renal cell carcinoma. In this context, <sup>89</sup>Zr-TLX250 PET/CT has been shown to have a  
23 significant impact on clinical decision making in patients with an indeterminate renal mass [13].  
24 Studies have also explored the use of <sup>89</sup>Zr-immuno-PET with other conjugated antibodies,  
25 demonstrating utility for monitoring treatment in animal models as well as potential as a tool in the  
26 clinical staging of breast cancer[14]. Collectively these studies highlight the potential diagnostic and  
27 therapeutic applications of <sup>89</sup>Zr-TLX250.  
28  
29

30  
31 Urinary excretion of FDG PET/CT is intrinsically problematic when imaging urinary tract malignancies  
32 as outlined above with low sensitivity for low volume or urinary tract associated disease. The hepatic  
33 clearance of <sup>89</sup>Zr-TLX250 with low urinary excretion is therefore anticipated to be advantageous for  
34 the local and regional staging of bladder and other urothelial carcinomas. This Phase I study aims to  
35 investigate <sup>89</sup>Zr-TLX250 utilization in the staging of urothelial carcinoma or bladder cancer exploiting  
36 the low urinary excretion.  
37  
38  
39  
40

## 41 **METHODS AND ANALYSIS**

### 42 **Protocol overview**

43  
44 This is a non-randomised, non-blinded, single centre, phase I trial comparing <sup>89</sup>Zr-TLX250 PET/CT with  
45 FDG PET/CT in patients with urothelial carcinoma or bladder cancer. Study duration will be 18 months,  
46 having commenced in May 2021 with the anticipated date of last data collection being December 31<sup>st</sup>,  
47 2022. It is being conducted at a single tertiary centre in Western Australia and will include two cohorts  
48 of adult patients; ten patients undergoing preoperative primary staging for recently diagnosed bladder  
49 cancer or urothelial carcinoma for consideration of treatment with curative intent, and ten patients  
50 with known metastatic urothelial carcinoma or bladder cancer.  
51  
52

53  
54 The primary objective of this study is to evaluate the feasibility of using <sup>89</sup>Zr-TLX250 PET/CT as a staging  
55 modality for urothelial carcinoma or bladder cancer. The secondary objectives are to evaluate the  
56 safety and tolerability of <sup>89</sup>Zr-TLX250 PET/CT, as well as its effectiveness as compared to FDG PET/CT.  
57 The eligibility criteria are listed in Table 1 and the trial schema is outlined in Figure 1. Eligible patients  
58 are also required to have undergone FDG PET/CT scanning (a part of standard of care) within the  
59  
60

proceeding 28 days to allow accurate comparison between the two modalities. All participants will provide written informed consent.

**TABLE 1:** Key inclusion and exclusion criteria

| <b>Inclusion criteria</b> |                                                                                                                                                                                                                                                                                                                                  |
|---------------------------|----------------------------------------------------------------------------------------------------------------------------------------------------------------------------------------------------------------------------------------------------------------------------------------------------------------------------------|
| 1.                        | Age $\geq$ 18 years old                                                                                                                                                                                                                                                                                                          |
| 2.                        | Able to provide informed consent                                                                                                                                                                                                                                                                                                 |
| 3.                        | Histologically diagnosed with urothelial carcinoma or bladder cancer (or upper tract urothelial carcinoma diagnosed based on standard imaging and malignant urine cytology or direct visualisation on ureteroscopy) or known metastatic bladder or other urothelial carcinoma (based on previous imaging and /or histopathology) |
| 4.                        | Negative serum pregnancy test in female patients of childbearing potential at screening. Confirmation of negative pregnancy test result from urine within 24 hours prior to receiving investigational product.                                                                                                                   |
| 5.                        | Consent to practise double-barrier contraception until a minimum of 42 days after $^{89}\text{Zr}$ -TLX250 administration.                                                                                                                                                                                                       |
| <b>Exclusion criteria</b> |                                                                                                                                                                                                                                                                                                                                  |
| 1.                        | Active malignancy other than urothelial carcinoma or bladder cancer                                                                                                                                                                                                                                                              |
| 2.                        | Administration of a radioisotope within 10 physical half-lives of $^{89}\text{Zr}$ prior to study enrolment.                                                                                                                                                                                                                     |
| 3.                        | Administration of chemotherapy, radiotherapy, or immunotherapy within 4 weeks prior to planned administration of $^{89}\text{Zr}$ -TLX250 or continuing adverse effects from such therapy                                                                                                                                        |
| 4.                        | Planned antineoplastic therapies for the period between administration of $^{89}\text{Zr}$ -TLX250 and imaging                                                                                                                                                                                                                   |
| 5.                        | Serious non-malignant disease that may interfere with the objectives of the study (e.g. advanced liver disease)                                                                                                                                                                                                                  |
| 6.                        | Renal insufficiency with glomerular filtration rate $\leq$ 45 mL/min/1.73m <sup>2</sup>                                                                                                                                                                                                                                          |
| 7.                        | Pregnancy or lactation                                                                                                                                                                                                                                                                                                           |
| 8.                        | Exposure to murine or chimeric antibodies within the last 5 years                                                                                                                                                                                                                                                                |
| 9.                        | Known hypersensitivity to or human anti-chimeric antibodies against girentuximab.                                                                                                                                                                                                                                                |
| 10.                       | Exposure to any experimental diagnostic or therapeutic agent in the 30 days prior to the date of planned administration of $^{89}\text{Zr}$ -TLX250                                                                                                                                                                              |
| 11.                       | Contraindications to FDG PET/CT                                                                                                                                                                                                                                                                                                  |

## Screening:

Procedures performed during the screening visit include a review of patient eligibility criteria (Table 1) and the obtaining of informed consent for trial enrolment. Participants will then undergo screening assessments including physical examination, recording of Eastern Cooperative Oncology Group (ECOG) Performance Status, vital signs, 12-lead electrocardiogram (ECG), review of prior/concomitant medications, and clinical laboratory tests (full blood count, urea and electrolytes, liver function test, serum  $\beta$ -HCG if applicable and urine analysis) as summarized in the schedule of study assessments (Table 2).

Table 2: The schedule of study assessments is set out as follows:

| Visit Name                 | Screening     | IMP Administration          | Imaging   | Follow Up                                                         |
|----------------------------|---------------|-----------------------------|-----------|-------------------------------------------------------------------|
| Time point                 | Day -28 to -1 | Day 0                       | Day 5 ± 2 | Day 14<br>(or before starting chemotherapy or undergoing surgery) |
| Informed consent           | X             |                             |           |                                                                   |
| Eligibility criteria       | X             |                             |           |                                                                   |
| <sup>18</sup> F-FDG-PET/CT | X             |                             |           |                                                                   |
| Physical exam              | X             |                             |           |                                                                   |
| ECOG status                | X             |                             |           |                                                                   |
| Vital signs                | X             | X<br>Pre and post injection | X         |                                                                   |
| 12 lead ECG                | X             | X<br>Post injection         |           |                                                                   |
| Haematology                |               |                             |           |                                                                   |
| Biochemistry               | X             |                             |           |                                                                   |
| Liver function tests       | X             |                             |           |                                                                   |
| Serum β-HCG                | X             |                             |           |                                                                   |
| Urine analysis             | X             |                             |           |                                                                   |
| Urine pregnancy test       |               | X                           |           |                                                                   |
| PET/CT                     |               |                             | X         |                                                                   |
| Adverse events             |               | X                           | X         | X                                                                 |
| Concomitant Medications    | X             | X                           | X         | X                                                                 |

### <sup>89</sup>Zr labelled girentuximab administration (Day 0)

On the day of injection, a urine pregnancy test will be performed to confirm ongoing non-pregnant status in all pre-menopausal women. A slow intravenous administration of 37 MBq (+/- 10%) <sup>89</sup>Zr-TLX250, containing a mass dose of 10mg of girentuximab (this dosage has been arrived at based on a previous trial [15]), will be delivered over 3 minutes. Vital signs and a 12 lead ECG will be performed before and after the intravenous injection. Adverse event recording according to the NCI-CTCAE v 5.0 will be performed following administration of the investigational agent.

### Imaging (Day 5 ± 2)

As part of PET/CT hybrid acquisition, whole body PET static and low-dose CT including brain to mid-thigh will be performed over a maximum of 45 minutes in 4 bed positions at a single time point on Day 5 ± 2 post administration of <sup>89</sup>Zr-TLX250. Vital signs will be recorded. Those who have potentially significant lesions with increased uptake on <sup>89</sup>Zr-TLX250 PET/CT but not on FDG PET/CT will have their imaging discussed at the next available Uro-Oncology multi-disciplinary team meeting to determine if further investigation or a deviation in management plan is indicated. Adverse event recording will be performed as previously discussed.

## Follow up (Day 14)

Participants will receive a phone consultation two weeks following the administration of the  $^{89}\text{Zr}$ -TLX250 (or before commencement of treatment) that will include a symptom enquiry, recording of concomitant medications, and adverse event recording (NCI-CTC v 5.0).

## Endpoints:

The primary endpoint is the feasibility of using  $^{89}\text{Zr}$ -TLX250 PET/CT as a staging modality for urothelial carcinoma or bladder cancer. The feasibility will be ascertained by the ability to recruit to the target sample size, deliver the  $^{89}\text{Zr}$ -TLX250 PET/CT and generate diagnostic grade images.

Secondary endpoints are the safety, tolerability, sensitivity, and specificity of  $^{89}\text{Zr}$ -TLX250 PET/CT as compared to FDG PET/CT. Safety and tolerability will be assessed according to vital signs, 12-lead ECGs, adverse event records, and the requirement for new medications. As part of the effectiveness analysis, tumour versus mediastinal uptake ratios will be calculated and compared for both the primary tumour and any other lesions identified for both modalities. The sensitivity and specificity of  $^{89}\text{Zr}$ -TLX250 PET/CT for detecting lymph node metastases will be calculated as compared to both FDG PET/CT and pathological lymph node status, where the patient proceeds to radical cystectomy and pelvic lymph node dissection.

A pragmatic target sample size of 20 patients has been chosen for this phase I feasibility study, based on the target population and other logistical factors. Descriptive statistics will be used in the reporting of the primary and secondary endpoints for this pilot study using appropriate parametric and non-parametric tests.

## Patient and Public Involvement:

Patients or the public are not involved in the design, conduct, reporting, or dissemination plans of our research.

## ETHICS AND DISSEMINATION

Ethics approval has been obtained from the South Metropolitan Health Service Human Research Ethics Committee (RGS000003940). The ZiPUP study has been registered with the Australian and New Zealand Clinical Trials Registry (registration number is ACTRN12621000411842). Also, it has been registered with the ClinicalTrials.gov (ClinicalTrials.gov identifier is NCT05046665).

Eligible patients will only be enrolled, and study-related procedures carried out after providing written informed consent. Patients will be given a full explanation, in lay terms, of the aims of the study and potential risks including as a written patient information sheet. It will be explained that they may refuse to take part in or withdraw from the study without prejudice to their future care and treatment at any time. In any case where the patient is not fluent in English, an interpreter will be present during the consenting process. Participants will be issued with a copy of the information provided and their signed consent to participate in the study.

## CONTRIBUTIONSHIP STATEMENT

Al-Zubaidi M: Write and reviewing the protocol as per BMJ Open requirement.

1  
2  
3 Viswambaram P: Write the initial protocol draft and review the final draft.  
4 McCombie Steve: Review and edit the final draft.  
5 Elizabeth Liow: Participated in protocol draft writing.  
6 Nat Lenzo: Review and edit the final draft.  
7 Thomas Ferguson: Participated in protocol draft writing.  
8 Andy Redfern: Review and edit the final draft  
9 Richard Gauci: Write the protocol draft.  
10 Dickon Hayne: Review the protocol draft, main supervisor of the study.  
11  
12

## 13 **COMPETING INTERESTS**

14 There is no competing interests  
15  
16

## 17 **FUNDING**

18 The study is sponsored by the South Metropolitan Health Service, Western Australia and is funded by  
19 Telix pharmaceuticals®, who will also supply the <sup>89</sup>Zr-TLX250 at no cost.  
20  
21  
22

## 23 **DATA SHARING STATEMENT**

24 Data collected from participants during the trial will be available by the end of it after deidentification.  
25 Study protocol, statistical analysis plan, informed consent form and clinical study report will be  
26 available after publication indefinitely, and available to be accesses by any individual.  
27  
28  
29  
30  
31

## 32 **REFERENCES**

- 33  
34  
35 1. IARC, Cancer Today. Estimated number of new cases in 2020, worldwide, both sexes,  
36 all ages. 2021 [access date March 2021].  
37 2. S Harsanyi, S Ziaran, K Bevizova, Z Varchulova Novakova, B Trebaticky, P Bujdak, S  
38 Galbavy, L Danisovic. The prognostic value of E-cadherin and Ki-67 compared to  
39 standard histopathologic examination in non-muscle invasive bladder cancer. Bratisl  
40 Lek Listy, 2020;121(6):444-449.  
41 3. Herr HW. Routine CT scan in cystectomy patients: does it change management?  
42 Urology 1996; 47:324.  
43 4. Donat MD, Herr HW. Transitional cell carcinoma of the renal pelvis and ureter:  
44 diagnosis, staging, management, and prognosis. In: Urologic Oncology, Osterling JE,  
45 Richie JP (Eds), WB Saunders Harcourt Brace & Co, Philadelphia 1997. p.215  
46 5. Jana S, Blaufox MD. Nuclear medicine studies of the prostate, testes, and bladder.  
47 Semin Nucl Med 2006; 36:51.  
48 6. Nayak B, Dogra PN, Naswa N, Kumar R. Diuretic 18F-FDG PET/CT imaging for detection  
49 and locoregional staging of urinary bladder cancer: prospective evaluation of a novel  
50 technique. *Eur J Nucl Med Mol Imaging* 2013; 40:386–393.  
51 7. Ivanov S, Liao SY, Ivanova A, Danilkovitch-Miagkova A, Tarasova N, Weirich G, Merrill  
52 MJ, Proescholdt MA, Oldfield EH, Lee J, et al: Expression of hypoxia-inducible cell-  
53 surface transmembrane carbonic anhydrases in human cancer. *Am J Pathol.* 2001, 158  
54 (3): 905-919.  
55 8. Klatte, Tobias, et al. "Carbonic anhydrase IX in bladder cancer: a diagnostic,  
56 prognostic, and therapeutic molecular marker." *Cancer: Interdisciplinary*  
57 *International Journal of the American Cancer Society* 115.7 (2009): 1448-1458.  
58  
59  
60

- 1
  - 2
  - 3
  - 4
  - 5
  - 6
  - 7
  - 8
  - 9
  - 10
  - 11
  - 12
  - 13
  - 14
  - 15
  - 16
  - 17
  - 18
  - 19
  - 20
  - 21
  - 22
  - 23
  - 24
  - 25
  - 26
  - 27
  - 28
  - 29
  - 30
  - 31
  - 32
  - 33
  - 34
  - 35
  - 36
  - 37
  - 38
  - 39
  - 40
  - 41
  - 42
  - 43
  - 44
  - 45
  - 46
  - 47
  - 48
  - 49
  - 50
  - 51
  - 52
  - 53
  - 54
  - 55
  - 56
  - 57
  - 58
  - 59
  - 60
9. de Martino, Michela, et al. "Carbonic anhydrase IX as a diagnostic urinary marker for urothelial bladder cancer." *European urology* 68.4 (2015): 552-554.
  10. Hofman, Michael S., et al. "[177Lu]-PSMA-617 radionuclide treatment in patients with metastatic castration-resistant prostate cancer (LuPSMA trial): a single-centre, single-arm, phase 2 study." *The Lancet Oncology* 19.6 (2018): 825-833.
  11. Floor C. J. van de Watering, Mark Rijpkema, Lars Perk, Ulrich Brinkmann, Wim J. G. Oyen, and Otto C. Boerman. "Zirconium-89 Labeled Antibodies: A New Tool for Molecular Imaging in Cancer Patients". *BioMed Research International* / 2014
  12. Van Dongen, G. A. M. S., et al. "89Zr-immuno-PET for imaging of long circulating drugs and disease targets: why, how and when to be applied?." *Quarterly Journal of Nuclear Medicine and Molecular Imaging* 59.1 (2015): 18-38.
  13. Hekman, Marlène CH, et al. "Positron emission tomography/computed tomography with 89Zr-girentuximab can aid in diagnostic dilemmas of clear cell renal cell carcinoma suspicion." *European urology* 74.3 (2018): 257-260.
  14. Gaykema, Sietske BM, et al. "89Zr-bevacizumab PET imaging in primary breast cancer." *Journal of nuclear medicine* 54.7 (2013): 1014-1018.
  15. [Evaluation of Safety, Biodistribution and Sensitivity/Specificity of PET/CT Imaging With 89Zr-TLX250 in Subjects With RCC - Full Text View - ClinicalTrials.gov](#)

## FIGURES

Figure 1: Trial Schema, Schema showing the pathway for patients recruited into the phase I trial of <sup>89</sup>Zirconium-labelled girentuximab (<sup>89</sup>Zr-TLX250) PET in Urothelial Cancer Patients (ZiPUP).

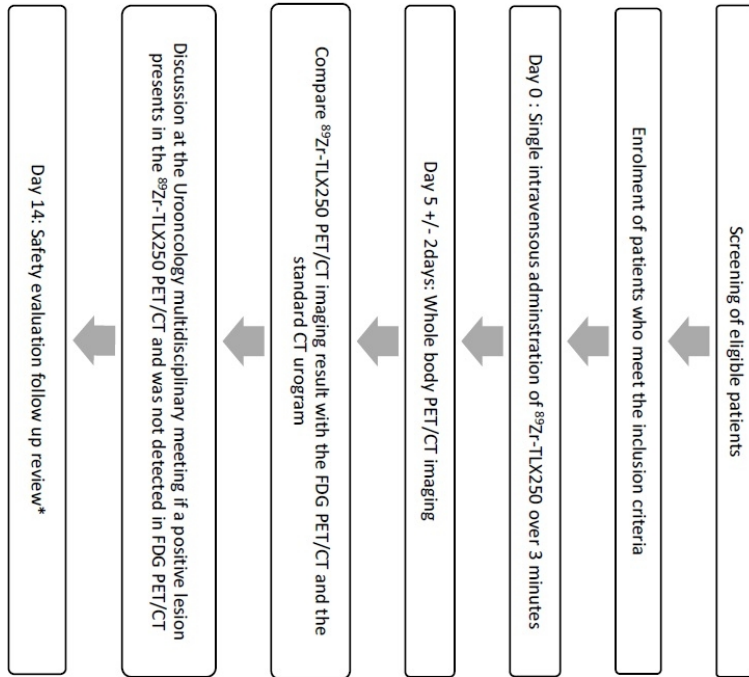

\*Vital signs, standard laboratory (full blood count, renal function, basic electrolytes and liver function test), 12-lead ECG and concomitant medication recording and adverse event recording (NCI-CTC v 5.0).

Trial Schema, Schema showing the pathway for patients recruited into the phase I trial of 89Zirconium-labelled girentuximab (89Zr-TLX250) PET in Urothelial Cancer Patients (ZiPUP).

81x67mm (300 x 300 DPI)

# BMJ Open

## 89Zirconium-labelled girentuximab (89Zr-TLX250) PET in Urothelial Cancer Patients (ZiPUP) – Protocol for a phase I trial of a novel staging modality for urothelial carcinoma.

|                                 |                                                                                                                                                                                                                                                                                                                                                                                                                                                                                                                                                                                                                                                                                                    |
|---------------------------------|----------------------------------------------------------------------------------------------------------------------------------------------------------------------------------------------------------------------------------------------------------------------------------------------------------------------------------------------------------------------------------------------------------------------------------------------------------------------------------------------------------------------------------------------------------------------------------------------------------------------------------------------------------------------------------------------------|
| Journal:                        | <i>BMJ Open</i>                                                                                                                                                                                                                                                                                                                                                                                                                                                                                                                                                                                                                                                                                    |
| Manuscript ID                   | bmjopen-2021-060478.R2                                                                                                                                                                                                                                                                                                                                                                                                                                                                                                                                                                                                                                                                             |
| Article Type:                   | Protocol                                                                                                                                                                                                                                                                                                                                                                                                                                                                                                                                                                                                                                                                                           |
| Date Submitted by the Author:   | 24-Mar-2022                                                                                                                                                                                                                                                                                                                                                                                                                                                                                                                                                                                                                                                                                        |
| Complete List of Authors:       | Al-Zubaidi, Mohammed; Royal Perth Hospital, Urology; Fiona Stanley Hospital, Urology<br>Viswambaram, Pravin; Fiona Stanley Hospital, Urology<br>McCombie, Steve; Fiona Stanley Hospital, Urology; UWA, Medical School<br>Liow, Elizabeth; Fiona Stanley Hospital<br>Lenzo, Nat; Fiona Stanley Hospital, Nuclear Medicine; Curtin University, Department of Medicine<br>Ferguson, Tom; Fiona Stanley Hospital, Department of Medical Oncology<br>Redfern, Andrew; Fiona Stanley Hospital, Department of Medical Oncology; UWA, School of Medicine and Pharmacology<br>Gauci, Richard; Fiona Stanley Hospital, Nuclear Medicine<br>Hayne, Dickon; University of Western Australia, School of Surgery |
| <b>Primary Subject Heading</b>: | Urology                                                                                                                                                                                                                                                                                                                                                                                                                                                                                                                                                                                                                                                                                            |
| Secondary Subject Heading:      | Radiology and imaging, Oncology                                                                                                                                                                                                                                                                                                                                                                                                                                                                                                                                                                                                                                                                    |
| Keywords:                       | Urological tumours < ONCOLOGY, Urological tumours < UROLOGY, Nuclear radiology < RADIOLOGY & IMAGING, NUCLEAR MEDICINE                                                                                                                                                                                                                                                                                                                                                                                                                                                                                                                                                                             |
|                                 |                                                                                                                                                                                                                                                                                                                                                                                                                                                                                                                                                                                                                                                                                                    |

SCHOLARONE™  
Manuscripts



# **<sup>89</sup>Zirconium-labelled girentuximab (<sup>89</sup>Zr-TLX250) PET in Urothelial Cancer Patients (ZiPUP) – Protocol for a phase I trial of a novel staging modality for urothelial carcinoma.**

Mohammed Al-Zubaidi<sup>1,2</sup>, Pravin Viswambaram<sup>1,2,3</sup>, Steve P McCombie<sup>1,2,3</sup>, Elizabeth Liow<sup>2,4</sup>, Nat Lenzo<sup>1,2,5,6</sup>, Thomas Ferguson<sup>1,2</sup>, Andy Redfern<sup>1,2,3</sup>, Richard Gauci<sup>1,2</sup>, Dickon Hayne<sup>1,2,3</sup>

1. Fiona Stanley Hospital, Murdoch, Western Australia, Australia
2. Australian and New Zealand Urogenital and Prostate (ANZUP) Cancer Trial Group, Camperdown, New South Wales, Australia
3. UWA Medical School, University of Western Australia, Crawley, Western Australia, Australia
4. Peter MacCallum Cancer Centre, Melbourne, Victoria, Australia
5. GenesisCare, Perth, Western Australia, Australia
6. Department of Medicine, Curtin University, Perth, Western Australia, Australia

## **Corresponding author details:**

Mohammed Al-Zubaidi  
Urology Department  
Fiona Stanley Hospital, Murdoch, WA 6150, Australia.  
E: [mohammed\\_az1985@yahoo.com](mailto:mohammed_az1985@yahoo.com)  
M: +61 478 416 576

## **ABSTRACT**

### **Introduction**

Bladder cancer is a lethal disease with a rising incidence on a background of limited conventional imaging modalities for staging (either Computed Tomography (CT) of the chest-abdomen-pelvis or <sup>18</sup>Fluorodeoxyglucose positron emitting tomography (FDG-PET/CT)). CT is known to have relatively low sensitivity for detecting low volume metastatic disease, an important goal when considering surgical interventions entailing significant potential morbidity. FDG is also limited, being predominantly renally excreted and therefore producing intense non-specific activity in the urinary tract, which limits its utility to detect bladder and upper tract lesions, or nodal metastases in close proximity to the urinary tract. <sup>89</sup>Zirconium-labelled girentuximab (<sup>89</sup>Zr-TLX250) may have utility in the accurate staging of bladder and urothelial carcinomas, with less renal excretion as compared to FDG, however this has not previously been investigated.

### **Methods and analysis:**

<sup>89</sup>Zirconium-labelled girentuximab PET in Urothelial Cancer Patients (ZiPUP) is a single-arm phase I trial examining the feasibility of using <sup>89</sup>Zr-TLX250-PET/CT as a staging modality for urothelial and bladder carcinomas by examining isotope uptake by the cancer. This trial will also examine the safety and utility of <sup>89</sup>Zr-TLX250-PET/CT in patients either undergoing pre-operative staging of bladder or other urothelial carcinomas for curative intent, or with known metastatic urothelial carcinomas. All participants will undergo <sup>89</sup>Zr-TLX250-PET/CT and will need to have undergone recent FDG-PET/CT for comparison. This trial aims to recruit 10 participants undergoing pre-operative staging and 10 participants with known metastatic disease. The primary endpoint is feasibility defined by the ability

1  
2  
3 to recruit to the target sample size within the study duration; secondary endpoints are safety,  
4 tolerability, sensitivity, and specificity in detecting lymph node metastases compared to FDG-PET/CT.  
5  
6  
7  
8

### 9 **Ethics and dissemination:**

10 Ethics approval has been obtained from the South Metropolitan Health Service Human Research Ethics  
11 Committee (RGS0000003940). ZiPUP study has been registered with the Australian and New Zealand  
12 Clinical Trials Registry (registration number ACTRN12621000411842) and with ClinicalTrials.gov  
13 (ClinicalTrials.gov identifier NCT05046665). Eligible patients will only be enrolled after providing  
14 written informed consent. Patients will be given a full explanation, in lay terms, of the aims of the  
15 study and potential risks including as a written patient information sheet.  
16  
17

### 18 **Strengths and limitations of the study:**

- 19  
20  
21
- 22 ● This will be the first study to generate data assessing the role of <sup>89</sup>Zr-TLX250 in the imaging of  
23 urothelial carcinoma patients.
  - 24 ● As a high-volume quaternary centre, there is capacity to recruit suitable trial subjects within  
25 a realistic timeframe.
  - 26 ● As a small study, the ability to detect modest differences between the imaging modalities is  
27 limited.
  - 28 ● The resolution quality of images that will be obtained and the optimum imaging timing have  
29 yet to be determined.  
30  
31

### 32 **Keywords:**

33 Zirconium, Girentuximab, bladder cancer, urinary tract cancer, urothelial carcinoma, 18F-  
34 fluorodeoxyglucose (FDG), Positron Emission Tomography/Computed Tomography (PET/CT), Carbonic  
35 anhydrase IX.  
36  
37  
38  
39

## 40 **ABBREVIATIONS**

41 <sup>89</sup>Zr-TLX250: <sup>89</sup>Zirconium-labelled girentuximab

42 CAIX: Carbonic anhydrase IX

43 FDG PET: Fluorodeoxyglucose positron emitting tomography

44 CT: Computed tomography

45 <sup>177</sup>Lu-PSMA-617: Lutetium-177 prostate-specific membrane antigen

46 MBq: Mega-Becquerel

47 ECOG: Eastern Cooperative Oncology Group

48 ECG: Electrocardiogram

49 β-HCG: Beta-human chorionic gonadotropin

50 NCI-CTCAE v 5.0: National Cancer Institute – Common Terminology Criteria for Adverse Effects version  
51 5.0  
52  
53  
54  
55  
56  
57  
58  
59  
60

## INTRODUCTION

### Urothelial cancer:

Bladder cancer is the most common malignancy involving the urinary system, and the tenth most common malignancy overall [1] with a rising incidence worldwide [2]. Transitional cell carcinoma is the predominant histologic type, accounting for approximately 90% of all bladder cancers. Transitional cell carcinoma also affects the renal pelvis, ureter, or urethra as all are lined with transitional cell urothelium. Diagnosis is usually made histologically with tissue obtained via transurethral resection, biopsy, or from urine cytology. As with all malignancies, the prognosis and treatment of the disease is determined by the histopathology and staging investigations.

### Current staging modalities:

The following modalities are currently utilised to detect the distribution and extent of urothelial tumours:

**Computed Tomography (CT)** of the chest, abdomen and pelvis including delayed-phase images are used to identify urothelial tumours, which may appear as filling defects on delayed-phase imaging or as enhancing soft tissue on the nephrographic phase. CT may demonstrate extravescical extension, tumour involvement or obstruction of the upper urinary tract nodal, involvement in the pelvis or retroperitoneum, and visceral or osseous metastasis. CT may miss tumours <1 cm in size, particularly those in the bladder trigone or dome, and it cannot accurately categorize depth of bladder wall invasion. The sensitivity of CT for identification of nodal involvement is relatively low (false-negative rate 68%, false-positive rate 16%) and may require biopsy for confirmation [3]. Approximately 50% of patients with a filling defect in the renal pelvis or ureter will have associated hydronephrosis, hydroureter, or a delayed nephrogram secondary to obstruction [4].

**<sup>18</sup>F-fluorodeoxyglucose (FDG) positron emitting tomography (PET)/CT** has limited value in the local staging of bladder cancer, largely due to urinary excretion of FDG affecting image interpretation of the bladder and any nodal disease in close proximity to the ureters [5]. However, FDG PET/CT is often useful in the distant staging of urothelial cancer, especially in high-risk disease with sensitivity of 78% in detecting locoregional lymph node metastasis as compared to 44% with CT alone [6].

### Carbonic anhydrase IX (CAIX)

CAIX is an enzyme that functions as a regulator of intracellular pH, cell proliferation, and cell adhesion in response to hypoxia [7]. CAIX is expressed abundantly in response to hypoxia in a wide range of cancer cell lines including bladder, renal, head and neck, lung, and colon cancers [7].

CAIX was distinctly expressed in >70% of urothelial carcinomas but was not expressed in normal urothelial tissue [8]. Previous data has demonstrated sensitivity and specificity of urinary CAIX of 86.2% and 95.1% respectively, for detection of urothelial bladder cancer (area under the curve 90.5%)

1  
2  
3 [9]. A significant association between CAIX expression in paired urine and tumour specimens has been  
4 established. Notably, CAIX was shown to have significantly higher predictive accuracy for urothelial  
5 carcinomas compared to urinary cytology (90.5% vs 71.7%), especially in low-grade tumours (90% vs  
6 61.8%) [9].  
7

8 These findings provide strong rationale for investigating the potential use of CAIX as a targeted  
9 imaging agent for the identification and diagnosis of bladder cancer. By the same token, the utility of  
10 CAIX as a therapeutic target also merits future investigation.  
11  
12

## 13 14 **PET/CT and <sup>89</sup>Zirconium-girentuximab (<sup>89</sup>Zr-TLX250)**

15  
16 Theranostic PET is a novel modality, combining the potential for both imaging and treatment as it  
17 enables the tracking of targeted vehicles and carriers using, for instance, isotope-labelled monoclonal  
18 antibodies. A notable example in the field of theranostics with an established therapeutic role is  
19 Lutetium-177 prostate-specific membrane antigen (<sup>177</sup>Lu-PSMA-617), a radionuclide agent that has  
20 garnered success in the treatment of castrate-resistant prostate cancer [10].  
21

22 Due to the intrinsic chemical properties of the relatively low energy positrons which provide high  
23 resolution PET images [11], <sup>89</sup>Zr has been identified as a suitable ligand candidate for this approach  
24 [12]. TLX-250 is an antibody directed against CAIX that has been widely studied in the setting of renal  
25 cell carcinoma. In this context, <sup>89</sup>Zr-TLX250 PET/CT has been shown to have a significant impact on  
26 clinical decision making in patients with an indeterminate renal mass [13]. Studies have also explored  
27 the use of <sup>89</sup>Zr-immuno-PET with other conjugated antibodies, demonstrating utility for monitoring  
28 treatment in animal models as well as potential as a tool in the clinical staging of breast cancer [14].  
29 Collectively these studies highlight the potential diagnostic and therapeutic applications of <sup>89</sup>Zr-  
30 TLX250.  
31  
32

33  
34 Urinary excretion of FDG PET/CT is intrinsically problematic when imaging urinary tract malignancies  
35 as outlined above with low sensitivity for low volume or urinary tract associated disease. The hepatic  
36 clearance of <sup>89</sup>Zr-TLX250 with low urinary excretion is therefore anticipated to be advantageous for  
37 the local and regional staging of bladder and other urothelial carcinomas. This Phase I study aims to  
38 investigate <sup>89</sup>Zr-TLX250 utilization in the staging of urothelial carcinoma or bladder cancer exploiting  
39 the low urinary excretion.  
40  
41  
42  
43

## 44 **METHODS AND ANALYSIS**

### 45 46 **Protocol overview**

47  
48 This is a non-randomised, non-blinded, single centre, phase I trial comparing <sup>89</sup>Zr-TLX250 PET/CT with  
49 FDG PET/CT in patients with urothelial carcinoma or bladder cancer. Study duration will be 18 months,  
50 having commenced in May 2021 with the anticipated date of last data collection being December 31<sup>st</sup>,  
51 2022. It is being conducted at a single centre in Western Australia and will include two cohorts of adult  
52 patients; ten patients undergoing preoperative primary staging for recently diagnosed bladder cancer  
53 or urothelial carcinoma for consideration of treatment with curative intent, and ten patients with  
54 known metastatic urothelial carcinoma or bladder cancer.  
55  
56  
57  
58  
59  
60

The primary objective of this study is to evaluate the feasibility of using  $^{89}\text{Zr}$ -TLX250 PET/CT as a staging modality for urothelial carcinoma or bladder cancer. The secondary objectives are to evaluate the safety and tolerability of  $^{89}\text{Zr}$ -TLX250 PET/CT, as well as its effectiveness as compared to FDG PET/CT. The eligibility criteria are listed in Table 1 and the trial schema is outlined in Figure 1. Eligible patients are also required to have undergone FDG PET/CT scanning (a part of standard of care) within the preceding 28 days to allow accurate comparison between the two modalities. All participants will provide written informed consent.

**TABLE 1:** Key inclusion and exclusion criteria

| <b><i>Inclusion criteria</i></b> |                                                                                                                                                                                                                                                                                                                                  |
|----------------------------------|----------------------------------------------------------------------------------------------------------------------------------------------------------------------------------------------------------------------------------------------------------------------------------------------------------------------------------|
| 1.                               | Age $\geq 18$ years old                                                                                                                                                                                                                                                                                                          |
| 2.                               | Able to provide informed consent                                                                                                                                                                                                                                                                                                 |
| 3.                               | Histologically diagnosed with urothelial carcinoma or bladder cancer (or upper tract urothelial carcinoma diagnosed based on standard imaging and malignant urine cytology or direct visualisation on ureteroscopy) or known metastatic bladder or other urothelial carcinoma (based on previous imaging and /or histopathology) |
| 4.                               | Negative serum pregnancy test in female patients of childbearing potential at screening. Confirmation of negative pregnancy test result from urine within 24 hours prior to receiving investigational product.                                                                                                                   |
| 5.                               | Consent to practise double-barrier contraception until a minimum of 42 days after $^{89}\text{Zr}$ -TLX250 administration.                                                                                                                                                                                                       |
| <b><i>Exclusion criteria</i></b> |                                                                                                                                                                                                                                                                                                                                  |
| 1.                               | Active malignancy other than urothelial carcinoma or bladder cancer                                                                                                                                                                                                                                                              |
| 2.                               | Administration of a radioisotope within 10 physical half-lives of $^{89}\text{Zr}$ prior to study enrolment.                                                                                                                                                                                                                     |
| 3.                               | Administration of chemotherapy, radiotherapy, or immunotherapy within 4 weeks prior to planned administration of $^{89}\text{Zr}$ -TLX250 or continuing adverse effects from such therapy                                                                                                                                        |
| 4.                               | Planned antineoplastic therapies for the period between administration of $^{89}\text{Zr}$ -TLX250 and imaging                                                                                                                                                                                                                   |
| 5.                               | Serious non-malignant disease that may interfere with the objectives of the study (e.g. advanced liver disease)                                                                                                                                                                                                                  |
| 6.                               | Renal insufficiency with glomerular filtration rate $\leq 45$ mL/min/1.73m <sup>2</sup>                                                                                                                                                                                                                                          |
| 7.                               | Pregnancy or lactation                                                                                                                                                                                                                                                                                                           |
| 8.                               | Exposure to murine or chimeric antibodies within the last 5 years                                                                                                                                                                                                                                                                |
| 9.                               | Known hypersensitivity to or human anti-chimeric antibodies against girentuximab.                                                                                                                                                                                                                                                |
| 10.                              | Exposure to any experimental diagnostic or therapeutic agent in the 30 days prior to the date of planned administration of $^{89}\text{Zr}$ -TLX250                                                                                                                                                                              |
| 11.                              | Contraindications to FDG PET/CT                                                                                                                                                                                                                                                                                                  |

## Screening:

Procedures performed during the screening visit include a review of patient eligibility criteria (Table 1) and the obtaining of informed consent for trial enrolment. Participants will then undergo screening assessments including physical examination, recording of Eastern Cooperative Oncology Group (ECOG) Performance Status, vital signs, 12-lead electrocardiogram (ECG), review of prior/concomitant

medications, and clinical laboratory tests (full blood count, urea and electrolytes, liver function test, serum Beta-human chorionic gonadotropin ( $\beta$ -HCG) if applicable and urine analysis) as summarized in the schedule of study assessments (Table 2).

**Table 2: The schedule of study assessments is set out as follows:**

| Visit Name                  | Screening     | IMP Administration          | Imaging       | Follow Up                                                         |
|-----------------------------|---------------|-----------------------------|---------------|-------------------------------------------------------------------|
| Time point                  | Day -28 to -1 | Day 0                       | Day 5 $\pm$ 2 | Day 14<br>(Or before starting chemotherapy or undergoing surgery) |
| Informed consent            | X             |                             |               |                                                                   |
| Eligibility criteria        | X             |                             |               |                                                                   |
| $^{18}\text{F}$ -FDG-PET/CT | X             |                             |               |                                                                   |
| Physical exam               | X             |                             |               |                                                                   |
| ECOG status                 | X             |                             |               |                                                                   |
| Vital signs                 | X             | X<br>Pre and post injection | X             |                                                                   |
| 12 lead ECG                 | X             | X<br>Post injection         |               |                                                                   |
| Haematology                 |               |                             |               |                                                                   |
| Biochemistry                | X             |                             |               |                                                                   |
| Liver function tests        | X             |                             |               |                                                                   |
| Serum $\beta$ -HCG          | X             |                             |               |                                                                   |
| Urine analysis              | X             |                             |               |                                                                   |
| Urine pregnancy test        |               | X                           |               |                                                                   |
| PET/CT                      |               |                             | X             |                                                                   |
| Adverse events              |               | X                           | X             | X                                                                 |
| Concomitant Medications     | X             | X                           | X             | X                                                                 |

### **$^{89}\text{Zr}$ labelled girentuximab administration (Day 0)**

On the day of injection, a urine pregnancy test will be performed to confirm ongoing non-pregnant status in all pre-menopausal women. A slow intravenous administration of 37 Mega-Becquerel (MBq) (+/- 10%)  $^{89}\text{Zr}$ -TLX250, containing a mass dose of 10mg of TLX250 (this dosage has been arrived at based on a previous trial [15]), will be delivered over 3 minutes. Vital signs and a 12 lead ECG will be performed before and after the intravenous injection. Adverse event recording according to the National Cancer Institute – Common Terminology Criteria for Adverse Effects version 5.0 (NCI-CTCAE v 5.0) will be performed following administration of the investigational agent.

### **Imaging (Day 5 $\pm$ 2)**

As part of PET/CT hybrid acquisition, whole body PET static and low-dose CT including brain to mid-thigh will be performed over a maximum of 45 minutes in 4 bed positions at a single time point 5  $\pm$  2 days post administration of  $^{89}\text{Zr}$ -TLX250. Vital signs will be recorded. Those who have potentially

1  
2  
3 significant lesions with increased uptake on  $^{89}\text{Zr}$ -TLX250 PET/CT but not on FDG PET/CT will have their  
4 imaging discussed at the next available Uro-Oncology multi-disciplinary team meeting to determine if  
5 further investigation or a deviation in management plan is indicated. Adverse event recording will be  
6 performed as previously discussed.  
7

## 8 9 **Follow up (Day 14)**

10 Participants will receive a phone consultation two weeks following the administration of the  $^{89}\text{Zr}$ -  
11 TLX250 (or before commencement of treatment) that will include a symptom enquiry, recording of  
12 concomitant medications, and adverse event recording (NCI-CTC v 5.0).  
13  
14

## 15 **Endpoints:**

16 The primary endpoint is the feasibility of using  $^{89}\text{Zr}$ -TLX250 PET/CT as a staging modality for urothelial  
17 carcinoma or bladder cancer. The feasibility will be ascertained by the ability to recruit to the target  
18 sample size, deliver the  $^{89}\text{Zr}$ -TLX250 PET/CT and generate diagnostic grade images.  
19

20  
21 Secondary endpoints are the safety, tolerability, sensitivity, and specificity of  $^{89}\text{Zr}$ -TLX250 PET/CT as  
22 compared to FDG PET/CT. Safety and tolerability will be assessed according to vital signs, 12-lead ECGs,  
23 adverse event records, and the requirement for new medications. As part of the effectiveness analysis,  
24 tumour versus mediastinal uptake ratios will be calculated and compared for both the primary tumour  
25 and any other lesions identified for both modalities. The sensitivity and specificity of  $^{89}\text{Zr}$ -TLX250  
26 PET/CT for detecting lymph node metastases will be calculated as compared to both FDG PET/CT and  
27 pathological lymph node status, where the patient proceeds to radical cystectomy and pelvic lymph  
28 node dissection.  
29

30  
31 A pragmatic target sample size of 20 patients has been chosen for this phase I feasibility study, based  
32 on the target population and other logistical factors. Descriptive statistics will be used in the reporting  
33 of the primary and secondary endpoints for this pilot study using appropriate parametric and non-  
34 parametric tests.  
35  
36  
37

## 38 **Patient and Public Involvement:**

39 Patients or the public are not involved in the design, conduct, reporting, or dissemination plans of our  
40 research.  
41  
42

## 43 **ETHICS AND DISSEMINATION**

44  
45 Ethics approval has been obtained from the South Metropolitan Health Service Human Research Ethics  
46 Committee (*RGS000003940*). The ZiPUP study has been registered with the Australian and New  
47 Zealand Clinical Trials Registry (registration number is *ACTRN12621000411842*). Also, it has been  
48 registered with ClinicalTrials.gov (ClinicalTrials.gov identifier is *NCT05046665*).  
49

50  
51 Eligible patients will only be enrolled, and study-related procedures carried out after providing written  
52 informed consent. Patients will be given a full explanation, in lay terms, of the aims of the study and  
53 potential risks including as a written patient information sheet. It will be explained that they may  
54 refuse to take part in or withdraw from the study without prejudice to their future care and treatment  
55 at any time. In any case where the patient is not fluent in English, an interpreter will be present during  
56 the consenting process. Participants will be issued with a copy of the information provided and their  
57 signed consent to participate in the study.  
58  
59  
60

## CONTRIBUTIONSHIP STATEMENT

Al-Zubaidi M: Write and reviewing the protocol as per BMJ Open requirement.

Viswambaram P: Write the initial protocol draft and review the final draft.

McCombie Steve: Review and edit the final draft.

Elizabeth Liow: Participated in protocol draft writing.

Nat Lenzo: Review and edit the final draft.

Thomas Ferguson: Participated in protocol draft writing.

Andy Redfern: Review and edit the final draft

Richard Gauci: Write the protocol draft.

Dickon Hayne: Review the protocol draft, main supervisor of the study.

## COMPETING INTERESTS

There is no competing interest.

## FUNDING

The study is sponsored by the South Metropolitan Health Service, Western Australia and is funded by Telix pharmaceuticals®, who will also supply the <sup>89</sup>Zr-TLX250 at no cost.

## DATA SHARING STATEMENT

Data collected from participants during the trial will be available by the end of it after deidentification. Study protocol, statistical analysis plan, informed consent form and clinical study report will be available after publication indefinitely, and available to be accesses by any individual.

## REFERENCES

1. IARC, Cancer Today. Estimated number of new cases in 2020, worldwide, both sexes, all ages. 2021 [access date March 2021].
2. S Harsanyi, S Ziaran, K Bevizova, Z Varchulova Novakova, B Trebaticky, P Bujdak, S Galbavy, L Danisovic. The prognostic value of E-cadherin and Ki-67 compared to standard histopathologic examination in non-muscle invasive bladder cancer. *Bratisl Lek Listy*, 2020;121(6):444-449.
3. Herr HW. Routine CT scan in cystectomy patients: does it change management? *Urology* 1996; 47:324.
4. Donat MD, Herr HW. Transitional cell carcinoma of the renal pelvis and ureter: diagnosis, staging, management, and prognosis. In: *Urologic Oncology*, Osterling JE, Richie JP (Eds), WB Saunders Harcourt Brace & Co, Philadelphia 1997. p.215
5. Jana S, Blaufox MD. Nuclear medicine studies of the prostate, testes, and bladder. *Semin Nucl Med* 2006; 36:51.
6. Nayak B, Dogra PN, Naswa N, Kumar R. Diuretic 18F-FDG PET/CT imaging for detection and locoregional staging of urinary bladder cancer: prospective evaluation of a novel technique. *Eur J Nucl Med Mol Imaging* 2013; 40:386–393.
7. Ivanov S, Liao SY, Ivanova A, Danilkovitch-Miagkova A, Tarasova N, Weirich G, Merrill MJ, Proescholdt MA, Oldfield EH, Lee J, et al: Expression of hypoxia-inducible cell-



1  
2  
3 surface transmembrane carbonic anhydrases in human cancer. *Am J Pathol.* 2001, 158  
4 (3): 905-919.

- 5  
6 8. Klatte, Tobias, et al. "Carbonic anhydrase IX in bladder cancer: a diagnostic,  
7 prognostic, and therapeutic molecular marker." *Cancer: Interdisciplinary*  
8 *International Journal of the American Cancer Society* 115.7 (2009): 1448-1458.
- 9  
10 9. de Martino, Michela, et al. "Carbonic anhydrase IX as a diagnostic urinary marker for  
11 urothelial bladder cancer." *European urology* 68.4 (2015): 552-554.
- 12  
13 10. Hofman, Michael S., et al. "[177Lu]-PSMA-617 radionuclide treatment in patients with  
14 metastatic castration-resistant prostate cancer (LuPSMA trial): a single-centre, single-  
15 arm, phase 2 study." *The Lancet Oncology* 19.6 (2018): 825-833.
- 16  
17 11. Floor C. J. van de Watering, Mark Rijpkema, Lars Perk, Ulrich Brinkmann, Wim J. G.  
18 Oyen, and Otto C. Boerman. "Zirconium-89 Labeled Antibodies: A New Tool for  
19 Molecular Imaging in Cancer Patients". *BioMed Research International* / 2014
- 20  
21 12. Van Dongen, G. A. M. S., et al. "89Zr-immuno-PET for imaging of long circulating drugs  
22 and disease targets: why, how and when to be applied?." *Quarterly Journal of Nuclear*  
23 *Medicine and Molecular Imaging* 59.1 (2015): 18-38.
- 24  
25 13. Hekman, Marlène CH, et al. "Positron emission tomography/computed tomography  
26 with 89Zr-girentuximab can aid in diagnostic dilemmas of clear cell renal cell  
27 carcinoma suspicion." *European urology* 74.3 (2018): 257-260.
- 28  
29 14. Gaykema, Sietske BM, et al. "89Zr-bevacizumab PET imaging in primary breast  
30 cancer." *Journal of nuclear medicine* 54.7 (2013): 1014-1018.
- 31  
32 15. Evaluation of Safety, Biodistribution and Sensitivity/Specificity of PET/CT Imaging With  
33 89Zr-TLX250 in Subjects With RCC - Full Text View - ClinicalTrials.gov  
34  
35  
36  
37  
38  
39  
40  
41  
42  
43  
44  
45  
46  
47  
48  
49  
50  
51  
52  
53  
54  
55  
56  
57  
58  
59  
60

## FIGURES

Figure 1: Trial Schema, Schema showing the pathway for patients recruited into the phase I trial of <sup>89</sup>Zirconium-labelled girentuximab (<sup>89</sup>Zr-TLX250) PET in Urothelial Cancer Patients (ZiPUP).



\*Vital signs, standard laboratory (full blood count, renal function, basic electrolytes and liver function test), 12-lead ECG and concomitant medication recording and adverse event recording (NCI-CTC v 5.0).

Trial Schema, Schema showing the pathway for patients recruited into the phase I trial of 89Zirconium-labelled girentuximab (89Zr-TLX250) PET in Urothelial Cancer Patients (ZiPUP).

81x67mm (300 x 300 DPI)
